# Supplementary material for: Spectral properties of the surface plasmon resonance and electron injection from gold nanoparticles to TiO2 mesoporous film: femtosecond study
Source: Royal Society of Chemistry journal article supplement (doi:10.1039/c2pp25227a), 2012-09-12
Supplement: c2pp25227a.pdf [file c2pp25227a.pdf]

# SPECTRAL PROPERTIES OF THE SURFACE PLASMON RESONANCE AND ELECTRON INJECTION FROM GOLD NANOPARTICLES TO TiO<sub>2</sub> MESOPOROUS FILM: FEMTOSECOND STUDY

**Arseniy Aiboushev<sup>a</sup>, Fedor Gostev<sup>a</sup>, Ivan Shelaev<sup>a</sup>, Andrei Kostrov<sup>a</sup>, Andrei Kanaev<sup>b</sup>, Luc  
Museum<sup>c</sup>, Mamadou Traore<sup>b</sup>, Oleg Sarkisov<sup>a</sup>, Victor Nadochenko<sup>\*a,d</sup>**

<sup>a</sup> Institute of Chemical Physics RAS, Kosigin str.4, Moscow, Russia, 119991. Fax: +7 495 939 74 94; Tel: +7 495 939 74 94; E-mail: [aiboosh@gmail.com](mailto:aiboosh@gmail.com)

<sup>b</sup> Laboratoire d'Ingénierie des Matériaux et des Hautes Pressions, CNRS, Institut Galilée, Université Paris-Nord, 93430 Villetaneuse, France. E-mail: [kanaev@limhp.univ-paris13.fr](mailto:kanaev@limhp.univ-paris13.fr); Fax: +33 1 4940341; Tel: +33 149403430 Laboratoire d'Ingénierie des Matériaux et des Hautes Pressions, CNRS, Institut Galilée, Université Paris-Nord, 93430 Villetaneuse, France. Fax: +33 1 4940341; Tel: +33 149403430, E-mail: [kanaev@limhp.univ-paris13.fr](mailto:kanaev@limhp.univ-paris13.fr);

<sup>c</sup> Laboratoire de Physique des Lasers—LPL CNRS, Institut Galilée, Université Paris-Nord, 93430 Villetaneuse, France. Fax: +33 1 49403200; Tel: +33 1 49403724, E-mail: [luc.museum@univ-paris13.fr](mailto:luc.museum@univ-paris13.fr);

<sup>d</sup> Institute of Problem of Chemical Physics RAS, Semenov av.1, Chernogolovka, Moscow region, Russia, 142432. Fax: +7 496 522 56 36; Tel: +7 496 522 17 85; E-mail: [nadochenko@gmail.com](mailto:nadochenko@gmail.com)

## Supplementary information.

SI 1.

The size parameter is given by  $x=ka$ ,  $a$  is the radius of the sphere and  $k=2\pi/\lambda$  is the wave number,  $\lambda$  the wavelength in the ambient medium,  $m=(\epsilon_1\mu_1)^{1/2}/(\epsilon\mu)^{1/2}$  is the refractive index with respect to the ambient medium,  $\epsilon_1$  and  $\mu_1$  are the permittivity and permeability of the sphere and  $\epsilon$  and  $\mu$  are the permittivity and permeability of the ambient medium.

The efficiencies  $Q_{ext}$ ,  $Q_{sca}$  and  $Q_{abs}$  for the interaction of radiation with a sphere of radius  $a$  are cross sections  $\sigma_{ext}$ ,  $\sigma_{sca}$ ,  $\sigma_{abs}$  normalized to the geometrical particle cross section,  $\sigma_g=\pi a^2$ .

$$Q_{ext} = Q_{sca} + Q_{abs}$$
$$Q_{ext} = \frac{2}{x^2} \sum_{n=1}^{\infty} (2n+1) \cdot \text{Re}(a_n + b_n)$$
$$Q_{sca} = \frac{2}{x^2} \sum_{n=1}^{\infty} (2n+1) (|a_n|^2 + |b_n|^2)$$

E. C. Le Ru and P. G. Etchegoin, Principles of Surface-Enhanced Raman Spectroscopy and Related Plasmonic Effects (Elsevier, Amsterdam, 2009).

SI 2.

The average number of photons per AuNP was estimated from the adsorbed optical energy (according to the laser pulse intensity, the spot size and the sample absorbance) and the concentration of gold nanoparticles. The electronic temperature rise was estimated from the gold heat capacity the adsorbed optical energy per AuNP. However, these values should be taken with care since uncertainties on the spot size are quite large (~30%).

The injected energy is subsequently redistributed among the electrons by electron-electron (e-e) scattering eventually leading to the establishment of an electron temperature  $T_e$ , and transferred to the lattice, leading to thermalization of the metal electron gas and lattice  $T_L$ . The theory is valid at low excitation power when the rise of the electronic temperature is not higher than  $\Delta T_e \sim 1000$  K. The change in the electron gas temperature  $dT_e$  and increment in the thermal energy  $\delta Q$  from the laser pulse are related by the expression  $\delta Q = c_e dT_e$

$$c_e = \frac{\pi^2 k_B^2}{2E_F} T_e \cdot N = g \cdot T_e N$$

$$g = \pi^2 k_B^2 / 2E_F$$

here  $c_e$  electron heat capacity,  $N=1.26 \cdot 10^5$  is a number of free electrons in the particle of 16 nm diameter,  $E_F = 5.53$  eV is Fermi energy of gold,  $k_B$  is Boltzmann constant.

By neglecting all kinds of energy dissipation ("sudden approximation") the transient electron temperature is

$$\Delta T_e = \sqrt{\frac{2Q}{gN} + T_L^2} - T_L$$

$\Delta T_e$  of 20 K corresponds to the fluence of  $24 \mu\text{J}/\text{cm}^2$ . The low perturbation regime is realized in the present work.  $c_e$  being much smaller than the lattice heat capacity  $C_L$ , the final temperature rise  $T_L - T_0$  of the fully thermalized electron-lattice system is always much smaller than  $T_e$ . It is of order of  $T_L - T_0 \sim c_e \Delta T_e / C_L \sim 0.01 \Delta T_e$ .

SI 3.

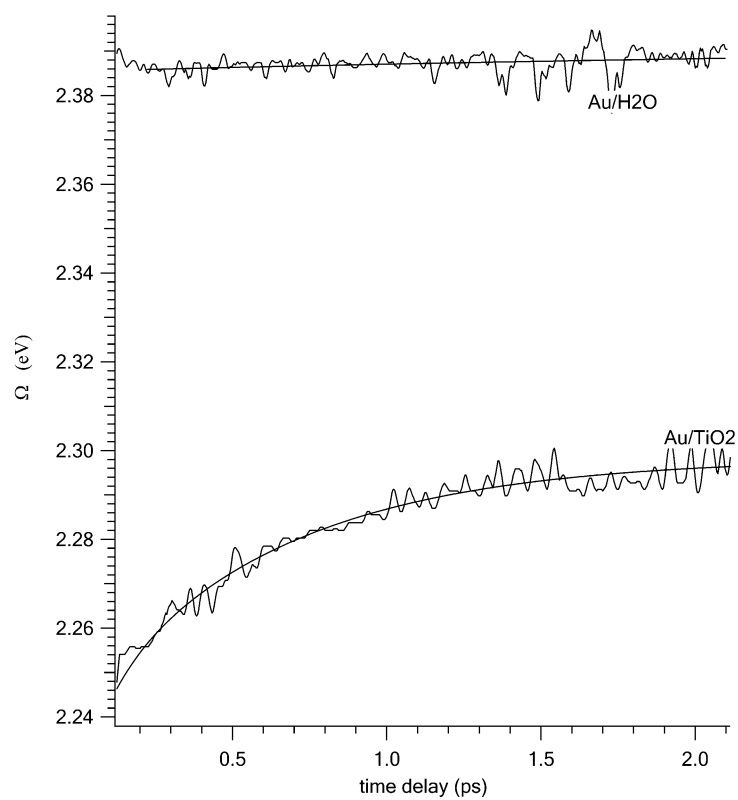

Figure SI3.1 Temporal evolution of the bleaching peak of transient absorption spectra of AuNP in aqueous colloid and in the mesoporous TiO<sub>2</sub> film.

SI 4.

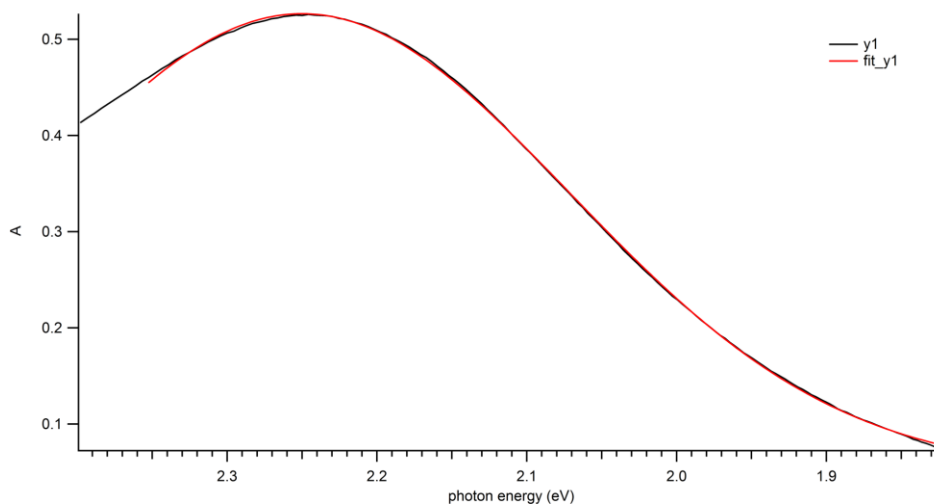

Figure SI4.1.  $y_1$  is the spectrum of Au/TiO<sub>2</sub> film. Fit\_y1 is the Gauss fit profile of  $y_1$ :

$$A = \frac{P_{abs}^0}{\sqrt{2\pi \cdot w_0^2}} \cdot \exp\left(-\frac{1}{2} \cdot \frac{(\omega - \Omega_{SPR}^0)^2}{w_0^2}\right), \text{ where } w_0 = 0.179 \pm 0.0004 \text{ and } \Omega_{SPR}^0 = 2.25 \pm 0.0002 \text{ eV}$$

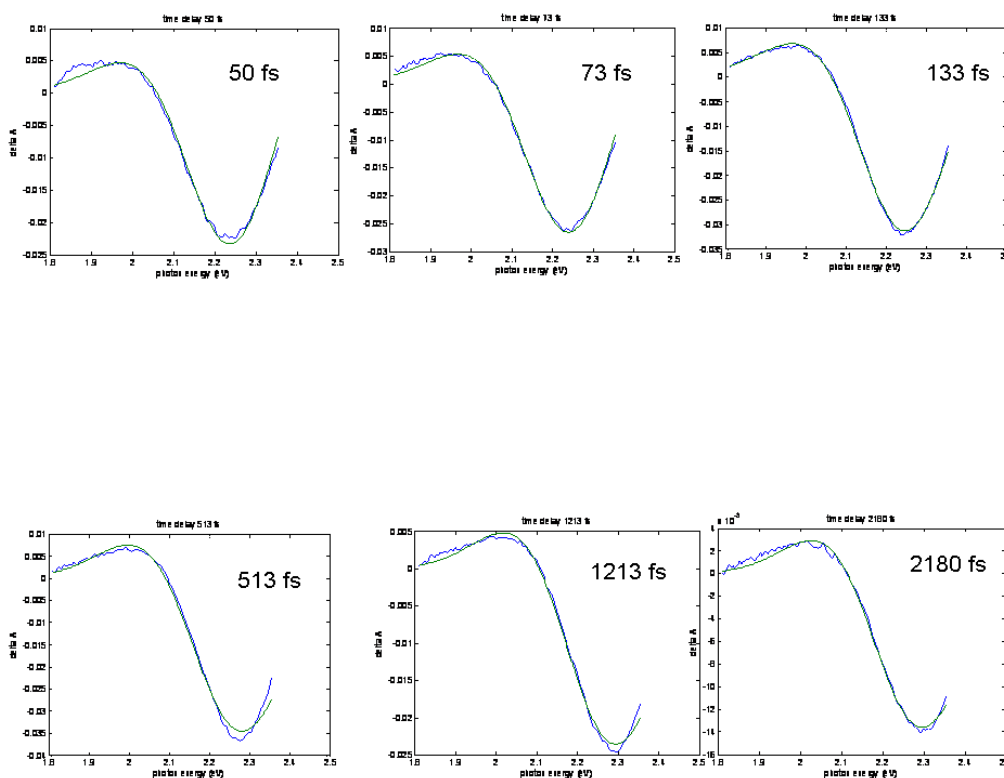

Figure SI 4.2 Examples of fitting of some selected transient spectra by a difference of Gaussian

functions

$$\Delta A(\omega, t) = \frac{P_{abs}(t)}{\sqrt{2\pi \cdot w(t)^2}} \cdot \exp\left(-\frac{1}{2} \cdot \frac{(\omega - \Omega_{SPR}(t))^2}{w(t)^2}\right) - \frac{P_{abs}^0}{\sqrt{2\pi \cdot w_0^2}} \cdot \exp\left(-\frac{1}{2} \cdot \frac{(\omega - \Omega_{SPR}^0)^2}{w_0^2}\right)$$
